# Supplementary material
Source: Springer Nature journal article supplement (https://www.springermedizin.de/resource/supplementary/12933_2013_778_MOESM1_ESM.pdf/9539208)
Supplement: MOESM1 [file 9539208]

**Additional Table 1: Composition of the used diets**

| Composition                    | Diets |       |       |
|--------------------------------|-------|-------|-------|
|                                | LF    | HFC   | HFSC  |
| <b>Kcal/g</b>                  | 3.85  | 5.24  | 5.54  |
| <b>Carbohydrate (kcal%)</b>    | 70    | 20    | 28    |
| <b>Sucrose (kcal%)</b>         | 34.5  | 6.8   | 17.5  |
| <b>Fat (kcal%)</b>             | 10    | 59.9  | 58    |
| <b>Protein (kcal%)</b>         | 20    | 20    | 15    |
| <b>Carbohydrate (wt%)</b>      | 67.3  | 26.3  | 38.1  |
| <b>Fat (wt%)</b>               | 4.3   | 34.8  | 35.5  |
| <b>Protein (wt%)</b>           | 19.2  | 26.2  | 20.5  |
| <b>Sucrose (g/kg)</b>          | 331.7 | 88.8  | 241.6 |
| <b>Maltodextrin 10 (g/kg)</b>  | 33.2  | 161.3 | 128.5 |
| <b>Corn Starch (g/kg)</b>      | 298.6 | 0     | 0     |
| <b>Lard* (g/kg)</b>            | 19    | 316.1 | 354.6 |
| <b>Soybean Oil (g/kg)</b>      | 23.7  | 32.3  | 0     |
| <b>Casein* (g/kg)</b>          | 189.6 | 258.1 | 201.7 |
| <b>Cholesterol added (wt%)</b> | 0     | 0.15  | 0.15  |

All diets also contained: vitamins and mineral mix.

\*Lard and Casein add small amounts of cholesterol: Used estimates of cholesterol content in lard = 0.72 mg per g and in Casein = 0.2 mg per gram (Product Data Sheet; Research Diets).

### Additional Table 2: Baseline characteristics

| Parameter               | LDLR <sup>-/-</sup> mice | ApoE <sup>-/-</sup> mice |
|-------------------------|--------------------------|--------------------------|
| Body weight (g)         | 23.5 ± 0.3               | 24.2 ± 0.5               |
| Fasting Glucose (mg/dL) | 187 ± 7                  | 179 ± 9                  |
| Fasting Insulin (ng/mL) | 0.79 ± 0.08              | 1.06 ± 0.12              |

Fasting glucose was measured in total blood samples and insulin was analyzed in plasma ( $n=6-8$  animals per group). Results are expressed as mean  $\pm$  SEM. There were no statistically significant differences between the LDLR<sup>-/-</sup> and ApoE<sup>-/-</sup> mice for all analyzed parameters.
